# Supplementary material
Source: HighWire-hosted journal article supplement (http://molpharm.aspetjournals.org/highwire/filestream/85073/field_highwire_adjunct_files/0/118950_Supplemental_compound_8_march18.pdf)

## Supplemental Data

### Small-molecule ligands that bind the RET receptor activate neuroprotective signals independent of but modulated by co-receptor GFR $\alpha$ 1

Sean Jmaeff, Yulia Sidorova, Hayley Lippiatt, Pablo F. Barcelona, Hinyu Nedev, Lucia M. Saragovi, Mark A. Hancock, Mart Saarma, H. Uri Saragovi

| Compound | MG87 RET/GFR $\alpha$ 1 |            | MG87 RET  |            |
|----------|-------------------------|------------|-----------|------------|
|          | 5 $\mu$ M               | 20 $\mu$ M | 5 $\mu$ M | 20 $\mu$ M |
| 116      | 102.3124                | 134.8646   | 99.44444  | 117.8862   |
| 206      | 162.1520                | 122.5338   | 121.6667  | 102.0325   |
| 210      | 268.2869                | 265.0870   | 133.3333  | 121.1382   |
| 302      | 121.7084                | 180.3675   | 102.7778  | 105.2846   |
| 226      | 262.9070                | 227.1760   | 182.7778  | 163.4146   |
| 224      | 131.9018                | 247.6306   | 99.44444  | 111.7886   |
| 65       | 162.0104                | 230.2708   | 130.5556  | 174.3902   |
| 47       | 136.6210                | 166.2476   | 140.0000  | 180.4878   |
| 29       | 258.9429                | 330.0290   | 185.0000  | 252.0325   |

**Supplemental Table 1.** Initial Compound Screening. In initial screens, ~200 compounds were tested in MG87 cells with and without GFR $\alpha$ 1 expression at 5 and 20  $\mu$ M. Data from a select panel are shown as the average relative increase in luminescence versus vehicle from 4 experiments. **Compound 29** was selected as a candidate hit as it generated significant increases in both cell types, and subsequent analogues were then tested. In these assays, GDNF as positive control induces higher increases in luciferase activity, ranging from 60-80 fold over vehicle, consistent with previous reports (Sidorova et al, 2010).

## Supplemental Figure 1.

Compound Structures. Overview of the structures as they are described by the NCI.

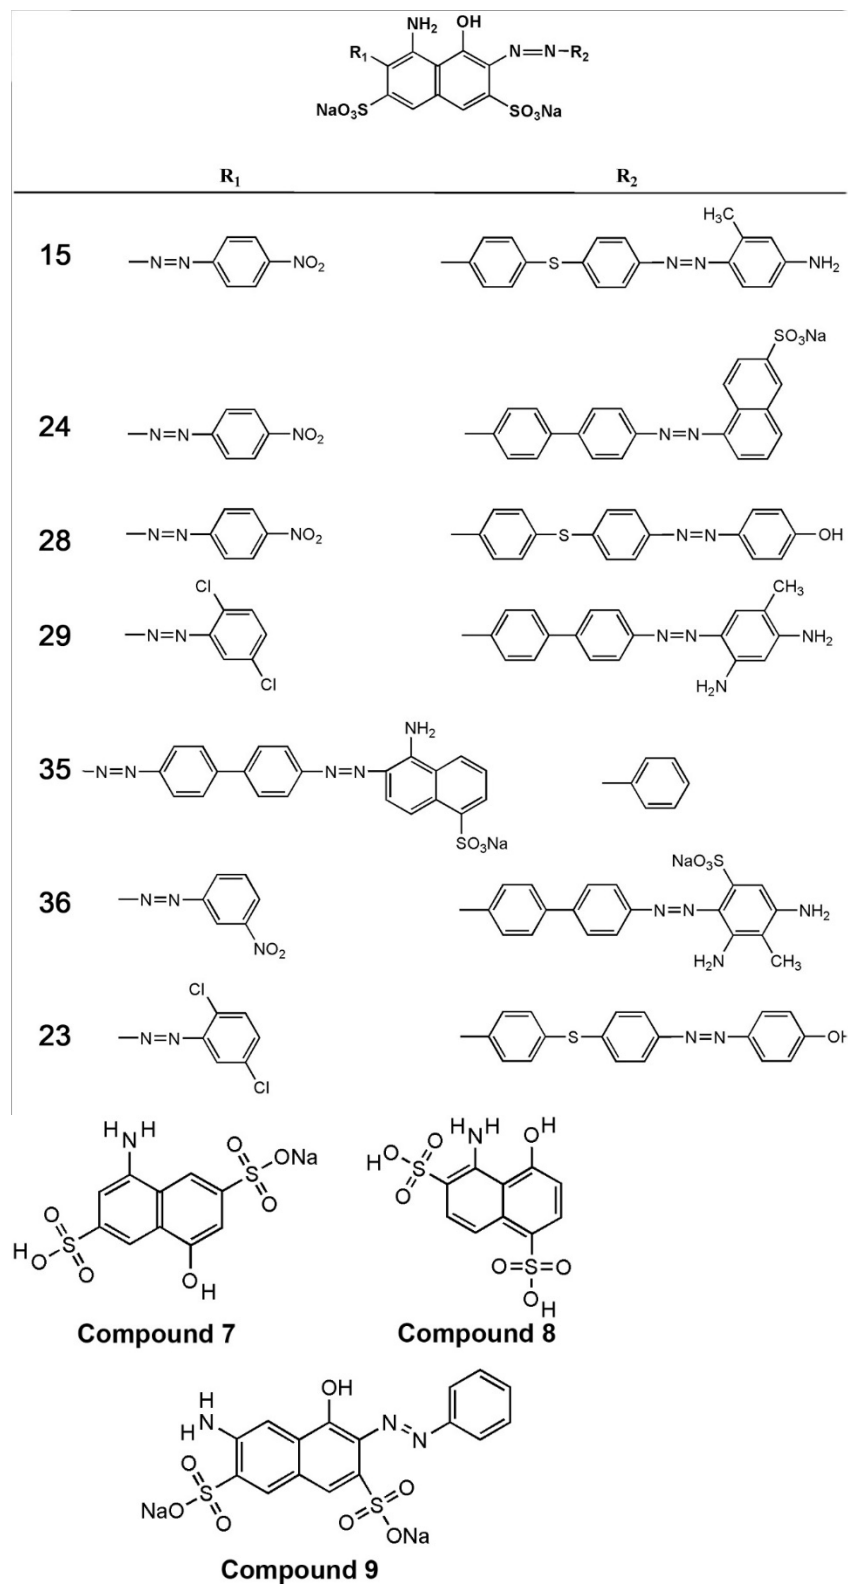

## Structural Properties of NCI Database Compounds and 4-amino-5-hydroxynaphthalene-1,3-disulfonic Acid

4-amino-5-hydroxynaphthalene-1,3-disulfonic acid was obtained commercially from TCI America (Product Code: A0363) as a dark powder with reported purity of >85.0%. Both Compound 8 and this product were purified on a 250 mm x 10 mm Kromasil 100-5-C18 semi-preparative column. A solvent gradient of 5-30%B was used for 30 minutes, where solvent A was HPLC grade H<sub>2</sub>O with 0.1% TFA, and solvent B was a 70/30 mix of Acetonitrile/H<sub>2</sub>O with 0.1% TFA. Samples of each were lyophilized yielding an off-white powder and dissolved in D<sub>2</sub>O for subsequent <sup>1</sup>H-NMR at 500 MHz. ESI mass spectra were obtained in negative mode with a Bruker Maxis Impact. Compounds 15, 23, 29, and 35 were dissolved in DMSO for mass spec analysis. Sulfonic acids ionize preferentially in negative mode, and commonly yield di-charged ions by ESI (Holcapek 1999).

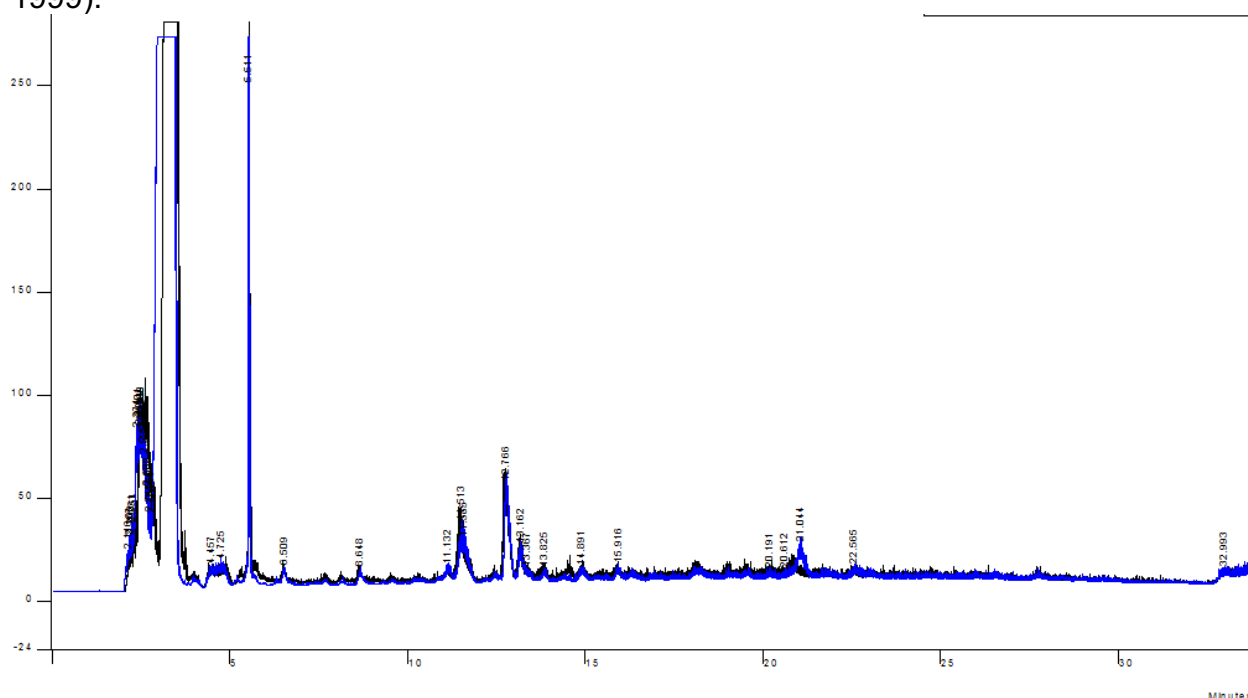

**Supplemental Figure 2.** HPLC chromatogram of the 5-30%B gradient showing 2 mg injections of 4-amino-5-hydroxynaphthalene-1,3-disulfonic Acid (Blue) and Compound 8 (Black). Both were relatively pure with the major fraction eluting ~3min. The overlay of the chromatograms suggest that the impurities in the mixture are likely to be similar.

### Supplemental Figure 3.

H-NMR resonances and the detected mass of 4-amino-5-hydroxynaphthalene-1,3-disulfonic Acid and of Compound 8 show that they are likely the same molecule.

Therefore compound 8 is incorrectly identified in the NCI database. Other agents (compounds 15,23,29,35) are also shown, and they correspond to the NCI-reports.

**Compound 8 (NSC37052).** <sup>1</sup>H-NMR (D<sub>2</sub>O, 500 MHz): δ 8.17 (s, 1H), 7.90 (dd, J = 8.6, 0.9 Hz, 1H), 7.44 – 7.37 (t, 1H), 6.84 (dd, J = 7.8, 0.9 Hz, 1H).

MS (ESI,-) *m/z* calcd for C<sub>10</sub>H<sub>7</sub>NO<sub>7</sub>S<sub>2</sub> [M-2H]<sup>2-</sup> calcd: 158.4837, found: 158.4841

**4-amino-5-hydroxynaphthalene-1,3-disulfonic acid.** <sup>1</sup>H-NMR (D<sub>2</sub>O, 500 MHz): δ 8.16 (s, 1H), 7.89 (dd, J = 8.5, 1.0 Hz, 1H), 7.44 – 7.37 (t, 1H), 6.84 (dd, J = 7.8, 1.1 Hz, 1H). MS (ESI,-) *m/z* calcd for C<sub>10</sub>H<sub>7</sub>NO<sub>7</sub>S<sub>2</sub> [M-2H]<sup>2-</sup> calcd: 158.4837, found: 158.4840

**Compound 15 (NSC65571).** MS (ESI,-) *m/z* calcd for C<sub>35</sub>H<sub>25</sub>N<sub>9</sub>O<sub>9</sub>S<sub>3</sub> [M-2H]<sup>2-</sup> calcd: 405.5474, found: 405.5460

**Compound 23 (NSC75661).** MS (ESI,-) *m/z* calcd for C<sub>34</sub>H<sub>21</sub>Cl<sub>2</sub>N<sub>7</sub>O<sub>8</sub>S<sub>3</sub> [M-2H]<sup>2-</sup> calcd: 410.5001, found: 410.5009

**Compound 29 (NSC79730).** MS (ESI,-) *m/z* calcd for C<sub>35</sub>H<sub>25</sub>Cl<sub>2</sub>N<sub>9</sub>O<sub>7</sub>S<sub>2</sub> [M-2H]<sup>2-</sup> calcd: 408.5353, found: 408.5356

**Compound 35 (NSC79745).** MS (ESI,-) *m/z* calcd for C<sub>38</sub>H<sub>25</sub>N<sub>8</sub>NaO<sub>10</sub>S<sub>3</sub> [M-2H]<sup>2-</sup> calcd: 436.0382, found: 436.0397

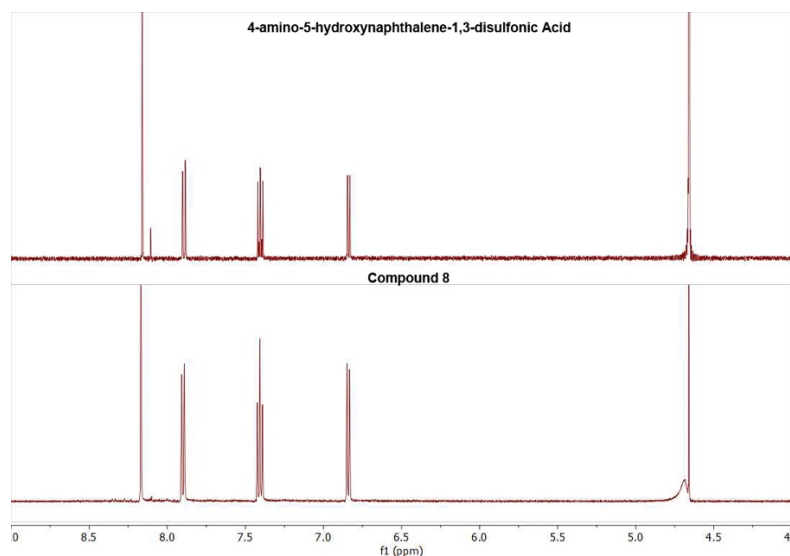

Supplement: 118950_Supplemental_compound_8_march18.pdf [file 118950_Supplemental_compound_8_march18.pdf]
